# Supplementary material for: Mechanistic aspects of the stereospecific reduction of chiral hydroxyalkyl phosphinates and phosphine oxides
Source: publisher site journal article supplement (doi:10.1515/pac-2016-0103), 2016-04-01

# Mechanistic aspects of the stereospecific reduction of chiral hydroxyalkyl phosphinates and phosphine oxides

Sébastien Lemouzy, Duc Hanh Nguyen, David Gatineau, Laurent Giordano\*, Damien Hérault\*, Gérard Buono\*

Aix Marseille Université, Centrale Marseille, CNRS iSm2 UMR 7313, 13397, Marseille (France)

## 1. General information

### 1.1. Solvents

All solvents were purified by standard procedures or obtained from a Solvent Purification System (Braun SPS 800). Unless otherwise mentioned, all reactions were carried out under an atmosphere of dry argon.

### 1.2. Thin layer chromatography

Thin Layer Chromatography (TLC) was carried out on Merck silica gel 60 F<sub>254</sub> and visualized under ultraviolet light (254 and 366 nm), or through spraying with 5% phosphomolybdic acid in EtOH, H<sub>2</sub>SO<sub>4</sub>-acidified p-Anisaldehyde solution in EtOH or by placing in iodine vapor. Flash chromatography was performed with Merck silica gel 60 (230-400 mesh).

### 1.3. Chiral High Performance Liquid Chromatography

Solvents for chiral chromatography (*n*-hexane, EtOH) are HPLC grade, degassed and filtered on Millipore membrane 0.45 μm before use. Chiralpak IA columns (250\*4.6mm) was used for the analytical separation. Chiral HPLC analyses were performed on a screening unit composed of Merck D-7000 system manager, Merck-Lachrom L-7100 pump, Merck-Lachrom L-7360 oven, Merck-Lachrom L-7400 UV detector and Jasco OR-1590 polarimetric or Jasco CD-1595 circular dichroism detector. Retention times *R<sub>t</sub>* are given in minutes, retention factor  $k_i = (R_{t_i} - R_{t_0})/R_{t_0}$  and enantioselectivity factor  $\alpha = k_2/k_1$ . The sign given by the chiroptical detector is the sign of the enantiomer in the mobile phase used, at the specified wavelength.

### 1.4. Nuclear Magnetic Resonance

<sup>1</sup>H, <sup>13</sup>C, <sup>11</sup>B and <sup>31</sup>P NMR spectra were recorded on Bruker Avance III nanobay spectrometers operating at 400 and 300 MHz for <sup>1</sup>H. <sup>13</sup>C and <sup>31</sup>P nuclei were observed with <sup>1</sup>H decoupling. Unless

otherwise specified NMR spectra have been made in  $\text{CDCl}_3$ . As external reference for  $^{31}\text{P}$  NMR spectra, 85% phosphoric acid was used. Chemical shifts ( $\delta$ ) of  $^1\text{H}$  and  $^{13}\text{C}$  are reported in ppm relative to  $\text{CHCl}_3$  ( $\delta = 7.26$  for  $^1\text{H}$  and  $\delta = 77.0$  for  $^{13}\text{C}$ ) and  $\text{C}_6\text{D}_6$  ( $\delta = 7.15$  for  $^1\text{H}$  and  $\delta = 128.02$  for  $^{13}\text{C}$ ).  $J$  values are given in Hz. Proton ( $^1\text{H}$ ) NMR information is given in the following format: multiplicity (s, singlet; d, doublet; t, triplet; q, quartet; sept; septet; m, multiplet), coupling constant  $J$ , number of protons). The prefix broad or b indicates the signal in question is broadened.

### 1.5. Physical and Analytical Measurements

$[\alpha]_{\text{D}}^{25}$  values were determined with a Perkin-Elmer Polarimetric 341. High-resolution MS experiments were performed with a QStar Elite mass spectrometer (Applied Biosystems SCIEX, Concord, ON, Canada) equipped with an electrospray ionisation (ESI) source. In the positive ion mode, the capillary voltage was set at +5500 V and the cone voltage was set between 10-55 V. In this hybrid instrument, ions were measured using an orthogonal acceleration time-of-flight (oa-TOF) mass analyzer. In MS, accurate mass measurements were performed using two reference ions from a poly(ethylene glycol) or poly(propylene glycol) internal standards.

## 2. NMR spectra

**Figure S1** :  $^1\text{H}$  NMR spectrum of **4b**

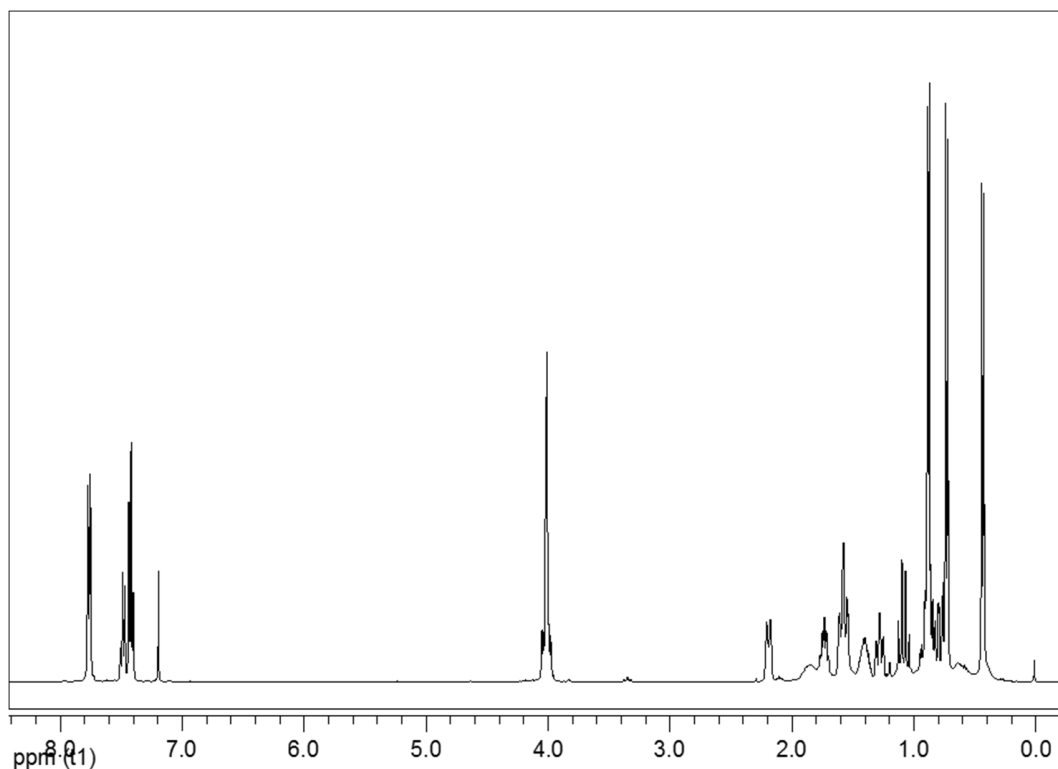

**Figure S2:**  $^3\text{P}\{^1\text{H}\}$  NMR spectrum of **4b**

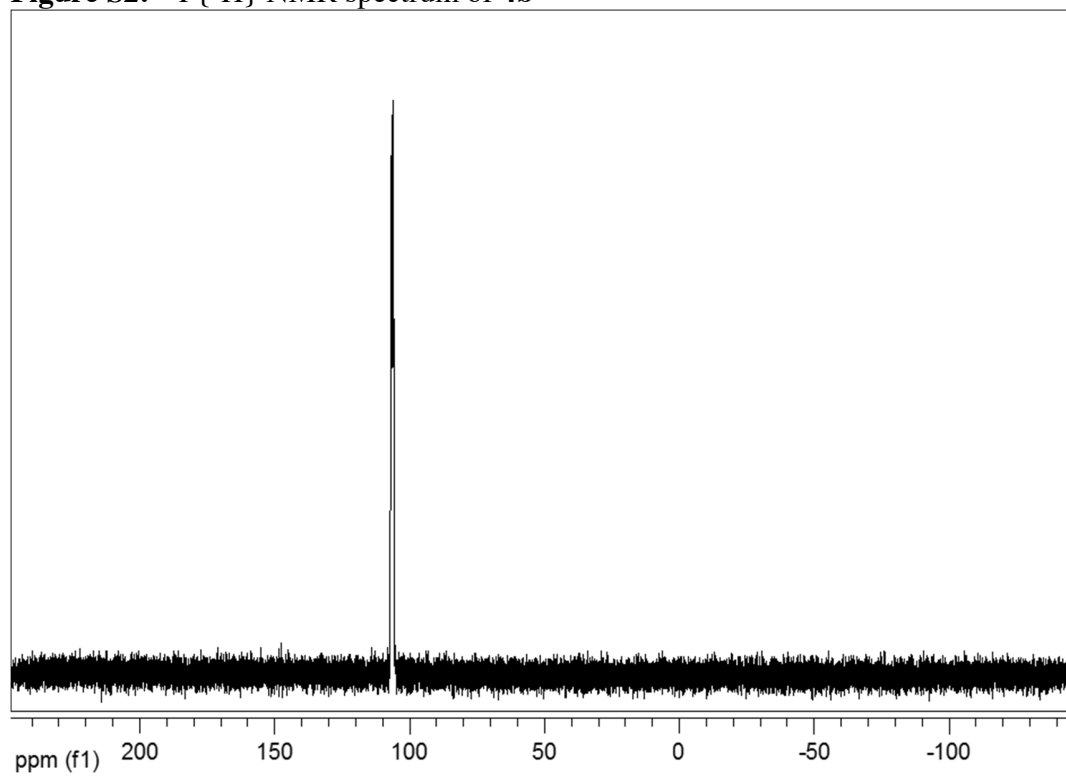

**Figure S3:**  $^{13}\text{C}\{^1\text{H}\}$  APT NMR spectrum of **4b**

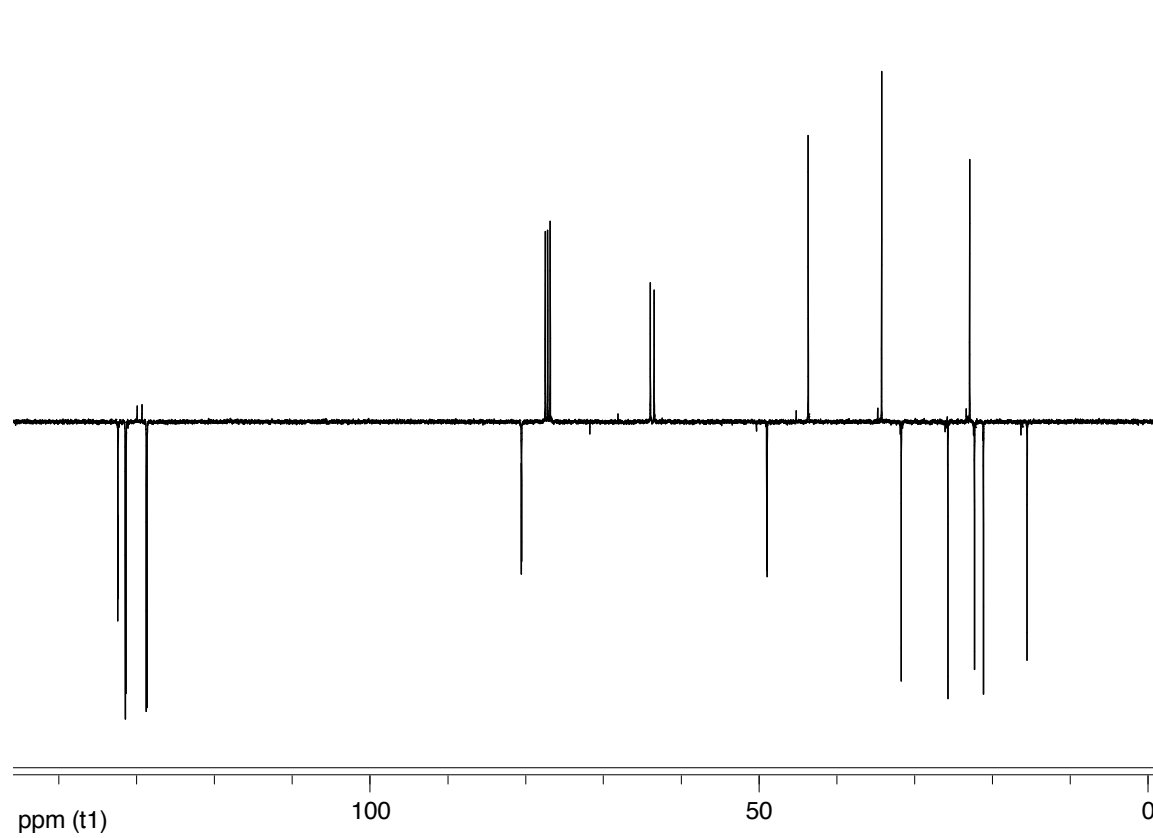

**Figure S4:**  $^{11}\text{B}\{^1\text{H}\}$  NMR spectrum of **4b**

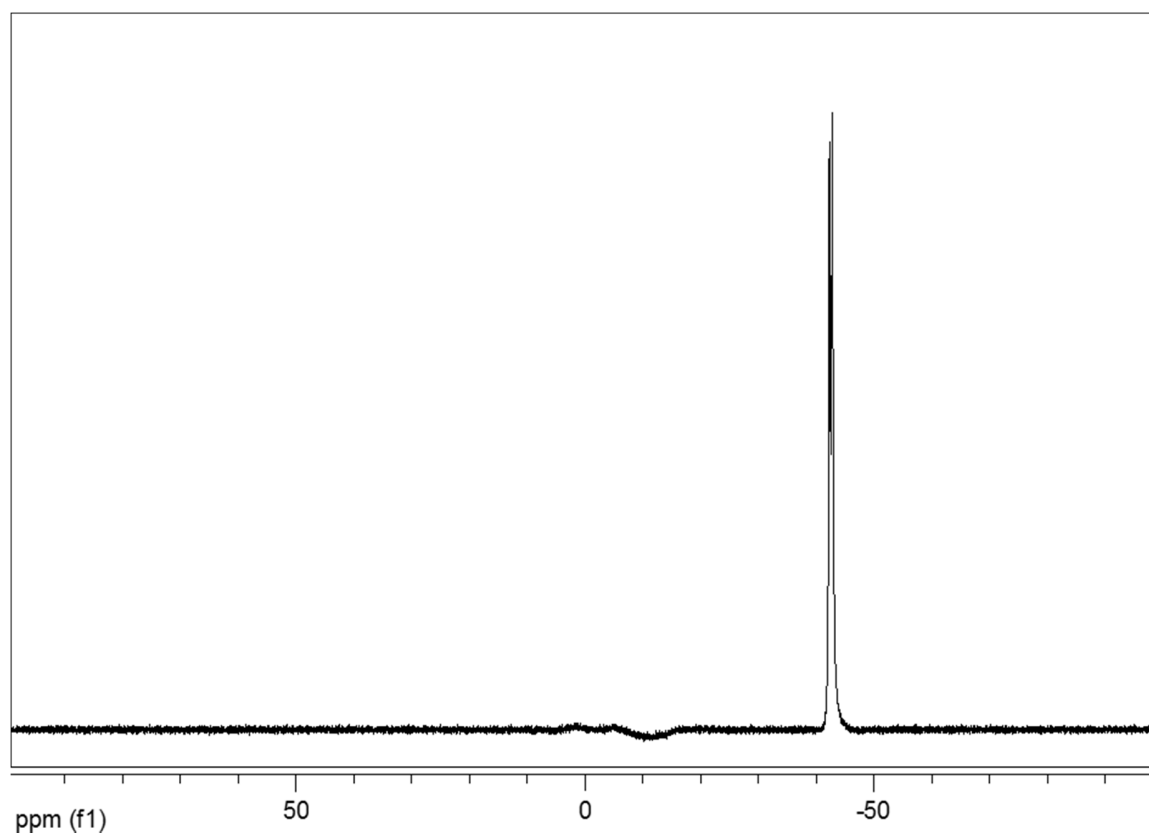

### 3. HPLC chromatograms

**Figure S5:** HPLC chromatogram of **4b**

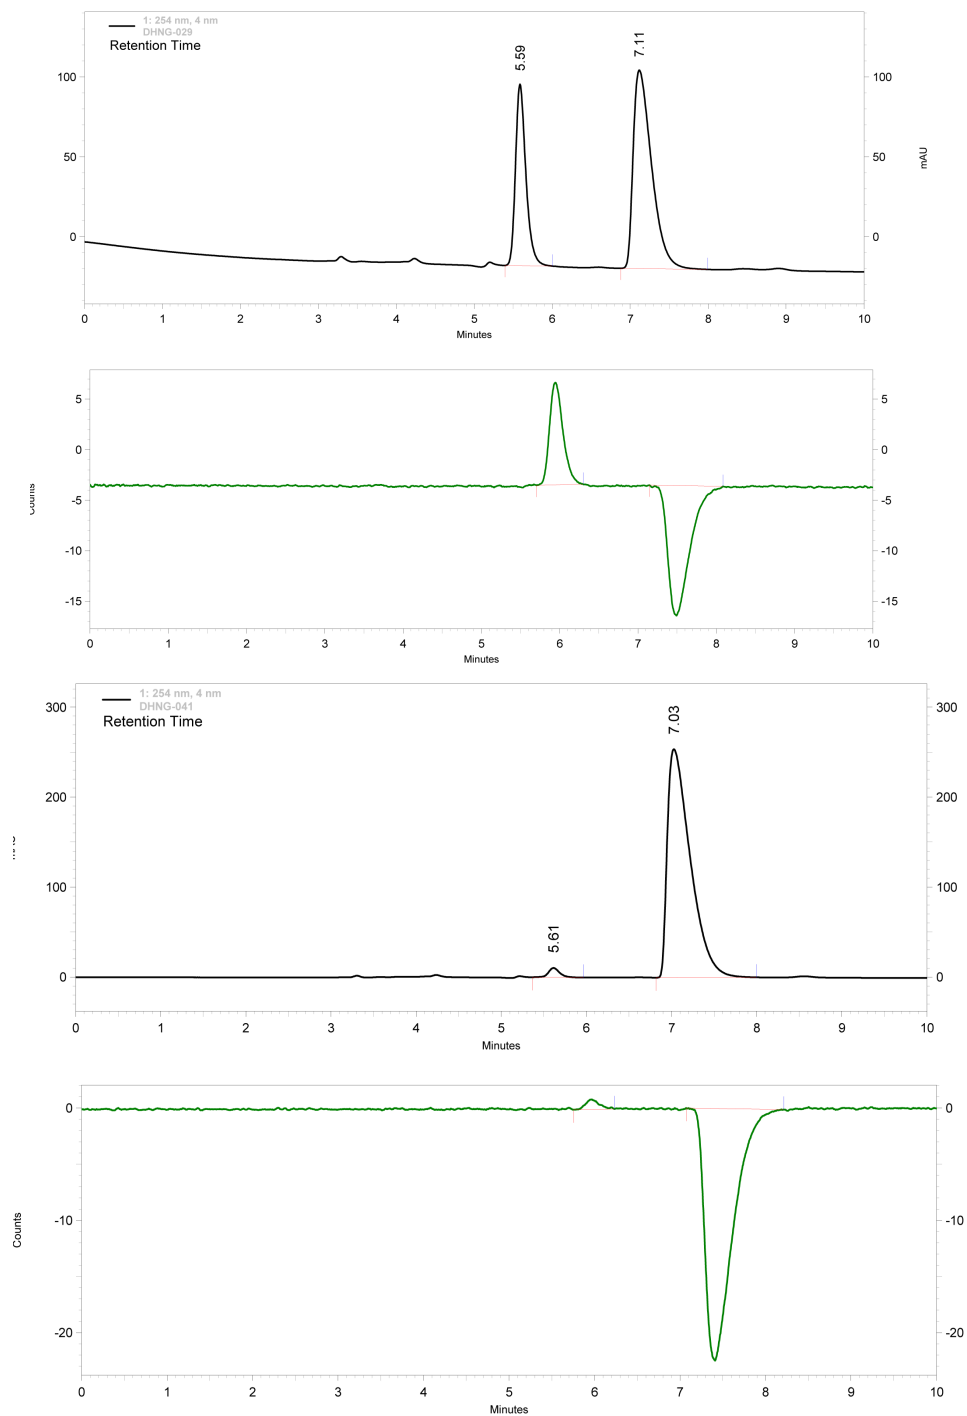

Supplement: Supplementary file 1 [file supporting_informations.pdf › Supplementary Material/supporting_informations.pdf]
